# Supplementary material for: An accurate benchmark description of the interactions between carbon dioxide and polyheterocyclic aromatic compounds containing nitrogen
Source: Royal Society of Chemistry journal article supplement (doi:10.1039/c5cp02365c), 2015-01-01
Supplement: c5cp02365c1.pdf [file c5cp02365c1.pdf]

**Supporting Information for**  
**“An Accurate Benchmark Description of the Interactions**  
**between Carbon Dioxide and Polyheterocyclic Aromatic**  
**Compounds Containing Nitrogen”**

Sicheng Li, Daniel G. A. Smith and Konrad Patkowski

*Department of Chemistry and Biochemistry, Auburn University, Auburn, AL36849, USA*

(Dated: May 22, 2015)

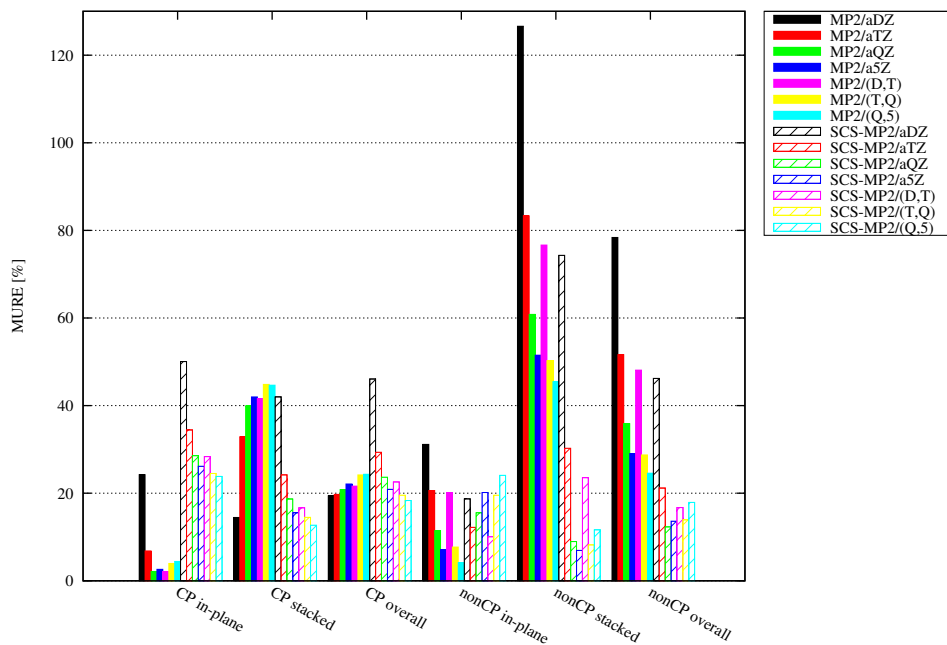

FIG. S1. The mean unsigned relative errors (MURE) for MP2 and SCS-MP2 compared, both CP-corrected and nonCP-corrected, to the CCSD(T)/CBS-level benchmark values as defined in the text. The “CP” means CP-corrected, and “nonCP” represents the nonCP-corrected values. The “overall” label signifies the results of all stacked and in-plane structures.

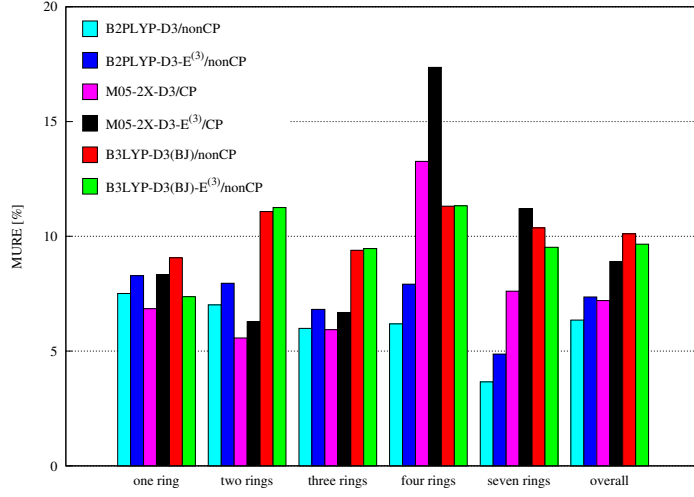

FIG. S2. The mean unsigned relative errors (MURE) for the best performers: M05-2X-D3/CP, M05-2X-D3-E<sup>(3)</sup>/CP, B2PLYP-D3/nonCP, B2PLYP-D3-E<sup>(3)</sup>/nonCP, B3LYP-D3(BJ), B3LYP-D3(BJ)-E<sup>(3)</sup>/nonCP, in the largest basis set QZVP computed, as functions of the number of rings in the N-PHAC molecule (the overall MURE for all 95 N-PHAC-CO<sub>2</sub> geometries is displayed in the last column) against the MP2/CBS+ $\Delta$ CCSD(T) benchmark interaction energies.

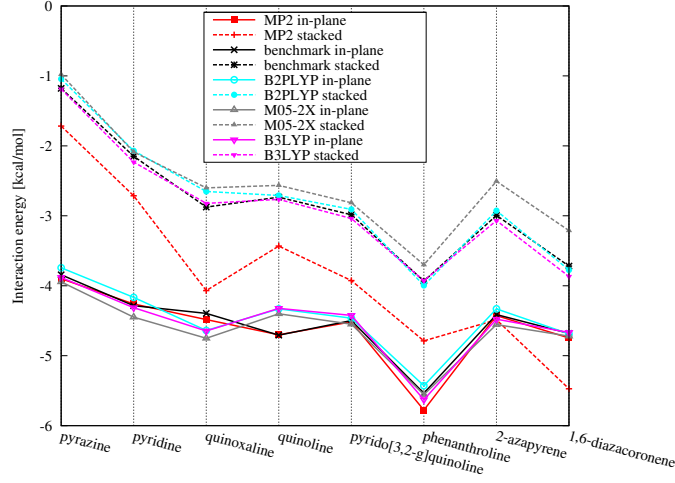

FIG. S3. Comparison of the interaction energies calculated by different approaches for the in-plane and stacked minimum structures (obtained as described in the text) of all N-PHAC-CO<sub>2</sub> dimers considered here. The MP2 values are taken from MP2-F12/(Q,5) for the seven symmetric 1- and 2-ring systems and MP2/(Q,5) for larger systems. The benchmark values are calculated at the MP2+ $\Delta$ CCSD(T) level as described in the text. The DFT results are: B2PLYP-D3/<sup>nonCP</sup><sub>QZVP</sub>, M05-2X-D3/<sup>CP</sup><sub>QZVP</sub>, and B3LYP-D3(BJ)/<sup>nonCP</sup><sub>QZVP</sub>.
